# Supplementary material for: Heterologous Biosynthesis of Health-Promoting Baicalein in Lycopersicon esculentum
Source: MDPI journal article supplement (doi:10.3390/molecules27103086), 2022-05-11
Supplement: s1 [file s1]

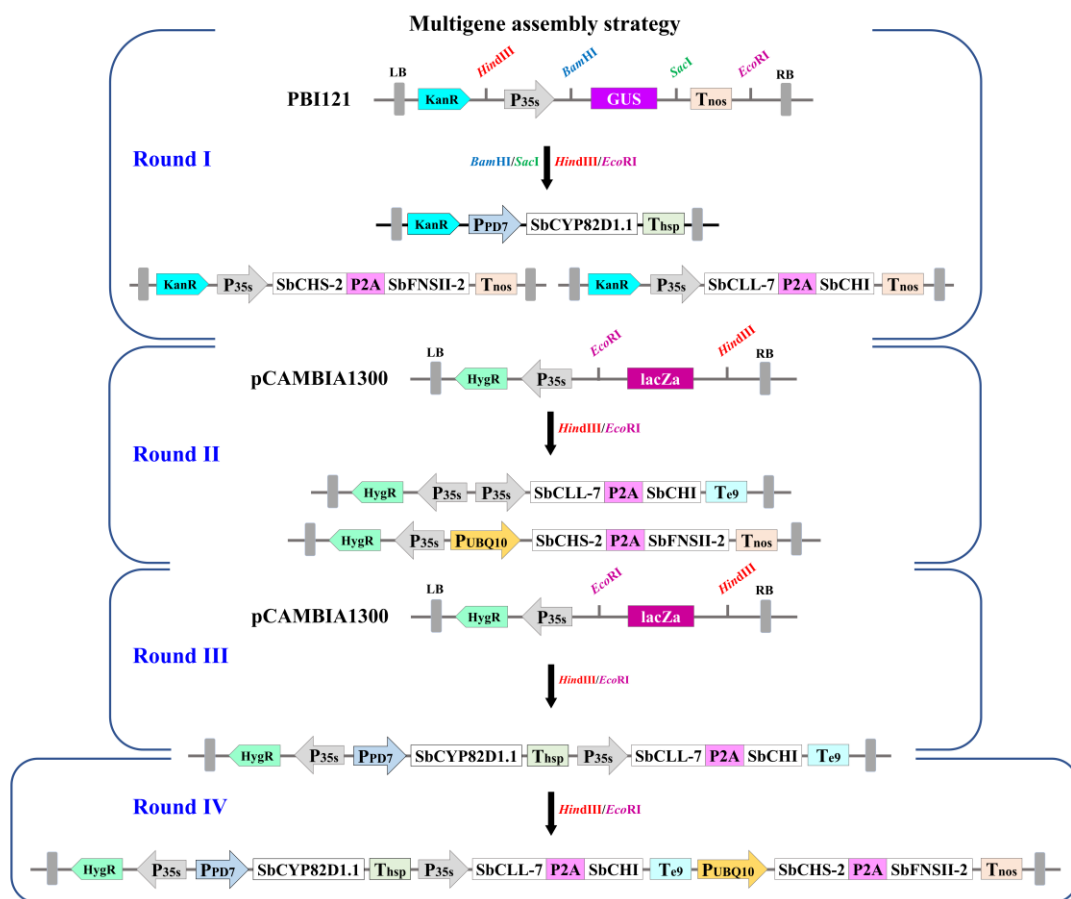

**Figure S1. The multigene assembly strategy for baicalein biosynthesis genes.** Total 4 rounds of multigene assembly have been performed in this experiment. The amino acid sequence of P2A is GSGATNFSLLKQAGDVEENPGP. *Bam*HI/*Sac*I and *Hind*III/*Eco*RI are restriction enzyme sites. HygR was hygromycin, KanR was kanamycin.

ATAGGCAACCGTGGACTTCTTCACTAGCTCATCGAGATAGCAATGCCACTAGCTAATT  
TCTTACGTTGTATCTTATTTGTTTTACTTTGGGGCATGACATGGTTAAACCCCATCAAA  
GAGAAAGTGTTTCATCCACTAGTCAATATACGAATTCATTTCGAATTTATCCCTGTAAA  
TCCTAGTTCTTAGGATGAACTGGTGTAAATAAACAGCAAAAAAAAAAAAAAAAAAAAA  
AAATCTGGAATCATTTCGACCACCTCAATAAACTAAAGCTACCAATTACCACAATATA  
GTCTTCCATATCCACTTAGATATAAAAGATAAAAGTAAACAAATATTAAATTTTCATAT  
GCACGCATAGGAAACTCATGATCTTATCTTTTAAATAGACATCTAGTTTTCTTAGGTT  
ATAAATAGACATTTTGTCTAGAACTTCTTCACTACTAAAACCTAGCCTCAAATGGAG  
TTGAGCTCTGTCATCTATGGCGCCATCGCCTTGCTCTCTCTTTTCTACTGTTACCTACA  
CTTCTCCAAGCCAAAAAAGAGTTCCCTGAACGCGCCGCGGAGGCTGGCGGCGCGCG  
CTTCATCACCGGCCACCTCCACCTGATGGACGGCCGCTCCGCCTCCGACAACTTCCT  
CACATAAACCTGGGTTTGCTTGCAGACCAGCACGGCCCAATCTTCACGATCAGGCTG  
GGCGTGCACCGAGCCGTGGTGGTGAGCAGCTGGGAGCTAGCCAAGGAGATCTTCACC  
ACCCACGACACGGCGGTTCATGGCTCGGCCCGGCTCATAGCCGACGACTACCTGAGC  
TACGACGGAGCCTCGCTTGGGTTCTCACCTACGGACCATACTGGCGCGAAATCCGC  
AAGCTGGTCAACACCGAGCTGCTCTCGGCTCGCCGGATCGAGCTGCAGCGAGCCACG  
CGTGTGCGTGAGATCACGCAGTTCACCGGCGAGCTCTACAAGCTGTGGGAGGAGAAG  
AAAGACGGGTCTGGGAGGGTTTTGGTGGACATGAAGCAGTGGCTGGGGAACCTTGAGC  
CTCAATCTGGTGTGAGGATGGTGGTGGGCAAGAGGTTCTACGGCGGCGACGACTCG  
GAGACGACCAAGAGGTGGCGGGGCGTCATGAGGGAGTTCTTCCAGCTCATCGGACAG  
TTCATCCCCGGCGACGGGCTTCCGTTTCTCCGGTGGCTCGACTTGGGTGGGTTCGAGA  
AGAGGACGAGGGACACTGCCTATGAGCTGGATAAGATCATCGCAATGTGGCTGGCGG  
AGTATCGGAAAAGGGAATATTCCGGCGACGACAAGGAGCAGTGCTTCATGGCCCTCA  
TGCTCTCACTCGTGCAAGCTAATCCCACTCTGCAACTCCACTACGATGCTGATACCAT  
CATCAAAGCTACTTGCCAGGTTTTGATATCGGCGGCAAGTGACACGACGACGGTGAT  
CCTAATCTGGGTAAATTTCCCTCCTACTAAACAATGCTGATGTCCTAAAAAAGGTTCAA  
GAAGAACTGGACGAACAAGTGGGGAGAGAAAGACGAGTGAAGAATCGGACATAA  
GCAATTTACCCTACCTCCAAGCGGTGGTGAAGGAGACAATGAGGCTATACCCTCCGG  
CCCCCTTCGCCGAGTACGAGCCTTCAGCGAAGACTGCACCGTGGGAGGCTACCACA  
TCCAGAAAGGCACGTTTTTGATAGTCAATCTGTGGAAGCTGCATCGAGACCCTCGTGT  
GTGGTCCGATGATGCCTTGGAGTTCAAACCACAACGGTTTTTTTGACAAAAGGTGGA  
GGTTAAGGGTCAGGACTTCGAGTTGATGCCATTTGGTGGTGGTCAAGAATGTGTCCC  
GGCTCGAACCTGGGCATGCACATGGTGCACCTTGTGCTGGCTAACATATTGCAGGCCT  
TTGACATAACCACTGGGTCCACTGTGGATATGACCGAGAGTGTTGGGTGACCAACA  
TGAAAGCCACACCACTTGATGCTATTCTCACTCCAAGGTTGTCACCTACTCTATATTA  
AATATGAAGATGAAGATGAAATATTTGGTGTGTCAAATAAAAAGGTTGTGTGCTTAAGT  
TTGTGTTTTTTTCTTGGCTTGTTGTGTTATGAATTTGTGGCTTTTTCTAATATTAAATGAA  
TGTAACATCTCATTATAATGAATAAAACAAATGTTTCTATAATCCATTGTGAATGTTTTGTT  
GGATCTCTTCTCCAGCATATAACTACTGTATGTGCTATGGTATGGACTATGGAATATGATT  
AAAGATAAGTGAGACTTTTCAACAAAGGGTAATATCCGGAAACCTCCTCGGATTCCATT  
GCCCAGCTATCTGTCACCTTATTGTGAAGATAGTGGAAGGAAGGTGGCTCCTACAA  
ATGCCATCATTGCGATAAAGGAAAGGCCATCGTTGAAGATGCCTCTGCCGACAGTGGT  
CCCAAAGATGGACCCCCACCCACGAGGAGCATCGTGGAAGAAAGACGTTCCAACC  
ACGTCTTCAAAGCAAGTGGATTGATGTGATATCTCCACTGACGTAAGGGATGACGCAC

AATCCCACTATCCTTCGCAAGACCCTTCCTCTATATAAGGAAGTTCATTTTCATTTGGAGA  
GAACAATGGAGAAATCGGGCTATGGCCGTGATGGAATATACAGATCATTGAGGCCACC  
GTTGTATCTTCCCAAAAATCCCAATCTTTCACCTTGTTCGTTTCTCTTCAGAAACGTTTC  
GTCTTTTGCTGATAACCGAGCTCTTGTGGATGCACATACTGGGGAAACCTTAACCTTCG  
CGCAGTTTAAATCCACGGTTTCAAAAGTCGCCCATGGTTTACTTCAACTGGGCATCAAG  
AAAAACGACGTCGTGCTCATCTTCGCTCCCAATTCGATCGAGTTCCCAATATCTTTCTTT  
GGGGTTATCGCCACTGGAGCCGTCGCCACCACGGTCAACCCCATGTATACTGTCTCGG  
AGCTATCCAAACAGGTTCAAGATTCTACTGCTAAGCTTATAATTACTGTTGAAGGTCTG  
TTGCCTAAAGTTAAGGATTTTGGTTTGCCTGTTATTCTTCTGGGAAATGAAAAGAAATC  
AGTTTTGCCATTGGGAGAATCCCTTCAATCACTTCATTTTCTGAGCTTGTGAACAATG  
AAGGGTTGGATTTAGATAGTAATGTTTATGGAATCAAGCAAGATGATACAGCTGCTTTG  
TTGTACTCATCCGGCACCACGGGTATGAGCAAGGGCGTTATACTTACTCATAGGAACTT  
CATAGCTTCCTCGTTGATGATCACTGCTGATCAAGAATCGGCTGGTGAAATGCACAATG  
TGTTTCTCTGTGTTCTGCCTATGTTTCATGTTTTTGGTCTTGCAGTGATCATGTTATCACA  
GCTGCAACGTGGAACACCATTTGTTTCGATGTCGAAGTTTGATTTTGAAATGATTTTGA  
AGACGGTGGAGAAGTATGGGATCACGCATATGTGGGTGTGCCGCCAATTATATTAGCT  
TTGGCCAAAAACAATGTGGTCAAGAAGTATAATTTGTCATCCTTGCAGCAGATTGGATC  
GGGGGCGGCTCCACTTGGGAGAGAATTGATGCAGGAATGTGCAAAGAATTTCCCTCAA  
GCTGTTGTCGTTCAAGGTTATGGAATGACAGAAACCTGTGGAATTGTCTCCGTCGAGA  
ATGTGTATGCAGGGCCACGACATTCTGGTCTGCTGGTACACTTGTTCCTGGTGTGGAG  
TGTCAAATAGTTAGTGTGATAAATTGAAGCCTCTTCCTCCTGGACAGTTGGGTGAAAT  
ATGCGTTCGAGGACCCAATATGATGCAAGGTTATTTTAAGAATCCACAGGCTACGAAGC  
TTACAATAGATAAACAGGGTTGGGTCCATACTGGAGATCTTGGATACTTCGATGATGAG  
GGTCAGCTCTTTGTTGTTGACCGTATTAAAGAGCTCATTAAGTACAAAGGTTTTTCAGGT  
TGCTCCAGCGGAGCTTGAAGGGCTACTCGTCTCTCATCCCGAGATATCAGATGCTGTTG  
TCATCCCGTTTCCTGATGCTGAAGCTGGTGAGGTCCCGATTGCTTATGTTGTCCGCGCT  
CCTAATAGCTCACTGTCTGAAGAAGATATCAAGAACTTCATTGCTGAGCAGGTGGCTCC  
TTTTAAAGATTGAGAAGAGTTACATTCATAAACAGTGTCCCGAAATCCGCAGCTGGG  
AAAATACTTAGAAGAGAACTCATCGAAAAGGTCCGATCGAAGTTAGGAAGCGGAGCT  
ACTAACTTCAGCCTGCTGAAGCAGGCTGGAGACGTGGAGGAGAACCTGGACCTATG  
TCTGCTTCGCCATCCGTCACCAAAGTCCTAGTCGAATCCATCGAGTTCTCGCCGGCCGC  
AAAGCCGCGGGATCCTCCAACACCTTATTCCTCGGCGGCGCCGGGGTGAGAGGAATG  
GAGATCCAGGGGAACCTTCGTGAAGTTCACGGCGATCGGTGTTTACTTGGAAGACAGCG  
CCGTTCCGTCTCTCGCCGTTAACTGGAAGGGCAAGACCGCCGAGGAGTTGACGGAGT  
CAGACGACTTTTTTCAGGGAAATCGTGTCTGGTCCCTTCGAGAAATTCACCAAGGTGAC  
GATGATTCTGCCATTGACGGGGAAGCAATACTCGGAGAAAGTTGCAGAGAACTGCGTT  
GCGTACTGGAAGCCGTAGGGAAATACACGGATGCTGAATCGGAAGCAATCGACAAG  
TTTCTCCAAGTGTTCAAGGACGAAACGTTTCGCGCCTGGAGCTTCCATCCTCTTCAACC  
AATCGCCGGCCGGCTCCTTGACGATTAGCTTCTCGAAAGACGGATCGATTCCAGAGCA  
AGGGAAGGCAGTAATAGAGAACAAACAGCTGTGCGAGGCAGTGCTGGAGTCGATCAT  
CGGAAAGCATGGTGTGTCGCCGTCGGCGAAGCAGAGTTTGGCGGCAAGACTATCGGA  
GTTGTTTTAAAGCTTTCGTTTCGTATCATCGGTTTCGACAACGTTTCGTCAAGTTCAATGC  
ATCAGTTTCATTGCGCACACACCAGAATCCTACTGAGTTTGAGTATTATGGCATTGGGA  
AAACTGTTTTTCTTGTACCATTTGTTGTGCTTGTAAATTACTGTGTTTTTTATTCGGTTTT

CGCTATCGAACTGTGAAATGGAAATGGATGGAGAAGAGTTAATGAATGATATGGTCCTT  
TTGTTCAATTCTCAAATTAATATTATTTGTTTTTCTCTTATTTGTTGTGTGTTGAATTTGAA  
ATTATAAGAGATATGCAAACATTTTGTGTTTGGAGTAAAAATGTGTCAAATCGTGGCCTCTA  
ATGACCGAAGTTAATATGAGGAGTAAACACTTGTAGTTGTACCATTATGCTTATTCACT  
AGGCAACAAATATATTTTCAGACCTAGAAAAGCTGCAAATGTTACTGAATACAAGTATG  
TCCTCTTGTGTTTTAGACATTATGAACCTTCCTTTATGTAATTTCCAGAATCCTTGTC  
GATTCTAATCATTGCTTTATAATTATAGTTATACTCATGGATTGTAGTTGAGTATGAAAA  
TATTTTTTAATGCATTTTATGACTTGCCAATTGATTGACAACATGCATCAA

GTCGACGAG  
TCAGTAATAAACGGCGTCAAAGTGGTTGCAGCCGGCACACACGAGTCGTGTTTATCA  
ACTCAAAGCACAAATACTTTTCTCAACCTAAAAATAAGGCAATTAGCCAAAAACAA  
CTTTGCGTGTAACAACGCTCAATACACGTGTCATTTTATTATTAGCTATTGCTTCACC  
GCCTTAGCTTTCTCGTGACCTAGTCGTCCTCGTCTTTTCTTCTTCTTCTTCTATAAAACA  
ATACCCAAAGAGCTCTTCTTCTTCACAATTCAGATTTCAATTTCTCAAAATCTTAAAA  
ACTTTCTCTCAATTCTCTCTACCGTGATCAAGGTAAATTTCTGTGTTCCCTTATTCTCTC  
AAAATCTTCGATTTTGTGTTTCGTTTCGATCCCAATTTTCGTATATGTTCTTTGGTTTAGATT  
CTGTTAATCTTAGATCGAAGACGATTTTCTGGGTTTGATCGTTAGATATCATCTTAATT  
CTCGATTAGGGTTTCATAGATATCATCCGATTTGTTCAAATAATTTGAGTTTTGTGCGAA  
TAATTACTCTTCGATTTGTGATTTCTATCTAGATCTGGTGTTAGTTTCTAGTTTGTGCG  
ATCGAATTTGTGCGATTAATCTGAGTTTTTCTGATTAAACAGATGGTGACAGTTGAAGAA  
TTCCACCGGGCAACACGGGCAGAGGGCCCCGCCACCGTCTTGCCATCGGCACGGCC  
AACCCCCAACTGCGTTGAGCAGTCTACTTATGCTGATTACTACTTTTCGATTTGTAA  
AAGTGAACACTTGACTGATCTTAAAAAGAAGTTTAGCCGCATGTGCGAAAAGTCTGGC  
ATCAAGAAACGTTACATGCATTTAACGGAGGAGTTTCTGAAGGAGAACGACAACCTTCA  
CGGCGTACGAGGCTCCGTCACTGGATGCCCAGGACATAGTGGTGGTGGAGATCCC  
GAAGCTGGGGAAGGAGGCTGCCCAGAAGGCGATCAAGGAATGGGGGCAGCCCAAGT  
CCAAGATCACCCACGTCATCTTCTGCACTACCAGCGGCGTCGACATGCCCGGCGCAGA  
CTACCAGATCACCAAGCTCCTCGGCCTCCGCCCTCCGTCAAGCGCTTCATGATGTACC  
AGCAGGGCTGCTTCGCCGGCGGCACGGTGCTCCGCATGGCCAAGGACCTGGCTGAGA  
ACAACGCCGGAGCTAGGGTTCTTGTCGTCTGCTCCGAGATCACCGCCATCACTTTCCG  
GGGGCCAGCGACACCCACCTCGACAGCCTGGTTCGGCCAGGCCCTGTTTCGGCGACGG  
CGCCGGGGCGGTTCATCGTTGGATCCGACCCCATCGTGGGGGTGGAGCGGCCGCTCTTC  
CAGCTGGTCTCGGCGGCGCAGACGATTCTCCCTGACAGTGAGGGCGCCATTGACGGCC  
ACGTCCGCGAGGTCGGGCTGACCTTCCACCTCCTCAAGGACGTCCCCGGGCTGATCTC  
CAAGAACATCGAGAAGAGCCTCAAGGAGGCCTTCGCGCCGCTGGGCATCTCCGACTG  
GAACTCCCTCTTCTGGATCGTGACCCCGGAGGTCCCGCCATTCTCGACCAGGTGGAG  
GAGAAGCTCGGGCTCAAGCCCGAGATCATGGTCCCAACCAGGCACGTGCTTAGCGAAT  
ACGGGAACATGTCCAGCGCCTGCGTTCTCTTCGTGATGGATGAGATGAGGAAGGCCTC  
CGCCAAGGACGGCTGCACCACCACCGGAGAAGGGAAGGACTGGGGGGTTCTTTTCGG  
CTTCGGCCCCGGCCTCACCGTTGAGACTGTAGTTCTGCATAGTGTGCCTCTCAAT

GGTT  
CAGGTGCCACTAATTTTTCTCTCTTGAAACAGGCCGGTGACGTTGAAGAGAACCCAGG  
TCCA

ATGGAAAGTCACACTGAATGTGGCCCTCCTCCTCCTCCTCCGCCGCGTCTGCCTGA  
TGGTCTTCACCGGTAAGAGGCGGCGGCCTCCCCAACCTCCGGGCCCCGTTCCCCCT  
CCCACTCATCGGAACCTGAACCTGGTGAGCCCGAGGCTGCACCACACCTTCCACATG  
CTGGCTCAGCGGTACGGGCCTATCATGAAGTTCCGGCTGGGGTCCATCCCCTGCCTGGT

GGTCTCCACGCCGGAGCTGGCCAAGGACATCCTCAAGACCCACGAGCTCATTTTCTCG  
TCGCGGGTCAAGTCCACCGCCATCGACATCGTCACCTATGGCGTCTCCTTCGCCTTCTC  
CCCCTACGGGGCCCTACTGGAAGTACATCAAGAAGCTGTGCACCTACGAGCTGCTGGGC  
TCGAGAATGCTGAACCACTTCGAGCCACTCAGGGCCCTGGAGGTGCGCGAGTTTCTCA  
AGGATGTGATGGCTATGGGGAAGGCTGGGAAGAGCTTCAACGTCACCTGAGGAGCTGA  
TGAAGCTCACCAGCAATGTCATGTCCAACATGATGCTCAGCATCAGAGCCGCCGAGTC  
GGAGGAGCAGGCCGAGGTGGCCAGGACTCTCATTCGAGAAGTTTCCCAGCTCTTCGG  
GGAGTTTGATTTTCGGAGATATGCTCTGGTTTTTGCAAGAGCTTCGACTTTTCAGGGGATCA  
AGAAGAGGTCCAAGGACATCAAGGTCAGGTACGATGCTTTGCTTGAAAAGATTCTCAC  
AGACAGAGAGAACGTCCGACGGCAAAACGGCGTCGTGGAGCCCAAGGACATGCTTG  
ACATGTTTCTTGATATCATGGAGGGCGGCAAAACCGACGTGGAATTCACCAGGGAACA  
TCTCAAAGCTGTCATTTTGGACTTCTTGACCGCGGGTACGGACACAACCGCCATAACG  
GTGGAATGGGTTCTTGCGGAGCTGATGAACAGCCCTAAAGCGATGAAGAAAGCTCAA  
GATGAAATGGACAGAGTGGTTGGAAGAGAGAGAATGATGGCAGAATCGGACGCCCCA  
AATCTGCCCTACTTCCTGGCCATCATAAAGGAGACCTTCAGGCTCCACCCTCCCATCCC  
CTTGATCATCCGCCGATCCATCGAAGACTGCGTCATCGACGGCTACCACATTCCGGCGG  
ACACCCTGGCCTTCATCAACGTGTGGTTCGATGGGGCGGAACGAAAAGTATTGGGACAG  
CCCCCTGTCGTTTCAGACCCGAGAGATTCTTGAGGGGGGACAATGCCGCCATTGATATC  
AAAGGGATGCACTTCGAGCTGCTGCCCTTCGGCTCTGGCAGGAGGGGCTGCCCCGGG  
ATGTTGTCCGCCATCCAGGAGGTGCTCATTATAGCCGGGACCGTCATCCAGTGCTTCGA  
CTGGGAGCAGGCTGACGGGTCGGGTCGGGTCGACATGAGCGAGCGCCCCGGCCTGAC  
CACGCCCCGGGAAATCGATCTGGTTTGCCGGGTCGTGCCCCGGGTCGACGAGAGGGTT  
ATTTCCGGGCACTGA **GATCGTTCAAACATTTGGCAATAAAGTTTCTTAAGATTGAATCC**  
**TGTTGCCGGTCTTGCGATGATTATCATATAATTTCTGTTGAATTACGTTAAGCATGTAATA**  
**ATTAACATGTAATGCATGACGTTATTTATGAGATGGGTTTTTATGATTAGAGTCCCGCAAT**  
**TATACATTTAATACGCGATAGAAAACAAAATATAGCGCGCAAACCTAGGATAAATTATCGC**  
**GCGCGGTGTCATCTATGTTACTAGATC**

**Figure S2. The nucleotide sequence of insertion fragment in the multigene vector FCC-CF.**

The baicalein biosynthesis genes *SbCYP82D1.1* (blue), *SbCLL-7* (pink), *SbCHS-2* (black), *SbCHI* (purple) and *SbFNSII-2* (gray) were showed in this graph. P2A peptides sequences was highlighted in red. The nucleotide sequences of two 2A peptides was different, but there was the same amino acid sequence of GSGATNFSLLKQAGDVEENPGP. *SbCYP82D1.1* gene was controlled by *AtPD7* promoter (red), and the terminator was heat-shock protein 18.2 terminator (Thsp) (highlighted in light yellow). *SbCLL-7-2A-SbCHS-2* was *CaMV 35S* promoter (green) and terminator from pea *rbcs-E9* gene (Te9) (highlighted in light green). *SbCHI-2A-SbFNSII-2* was under the control of *AtUBQ10* promoter (orange) and terminator of nopaline synthase gene (Tnos) (highlighted in light blue).

**Table S1. Primers used for multigene assembly**

**Primers for Round I of multigene assembly**

| Primer             | Sequences (5' to 3')                                            |
|--------------------|-----------------------------------------------------------------|
| PBI121-PD7-F       | <u>tatgaccatgattacgccaagctt</u> ATAGGCAACCGTGGACTTCTTC          |
| PBI121-PD7-R       | <u>gctcaactccat</u> TTGAGGCTAGGTTTTAGTAGTGAAG                   |
| PD7-SbCYP2D1.1-F   | <u>agcctcaa</u> ATGGAGTTGAGCTCTGTCATCTATG                       |
| PD7-SbCYP2D1.1-R   | <u>tcttcattctcatat</u> TAATATAGAGTAGGTGACAACCTTGG               |
| SbCYP2D1.1-Thsp-F  | <u>aatcgttta</u> ATATGAAGATGAAGATGAAATATTTG                     |
| SbCYP2D1.1Thsp-R   | <u>aaaacgacggccagtgaattc</u> CTTATCTTTAATCATATTCCATA            |
| PBI121-SbCLL-7-F   | <u>acgggggactctagaggatcc</u> ATGGAGAAATCGGGCTATGG               |
|                    | <u>tgCTTCAGCAGGCTGAAGTTAGTAGCTCCGCTTC</u> TAACCTCGATCGGACCT     |
| PBI121-SbCLL-7-R   | TTTC                                                            |
|                    | <u>aattcagcctgctgaag</u> CAGGCTGGAGACGTGGAGGAGAACCCTGGACCTATGTC |
| PBI121-SbCHI-F     | TGCTTCGCCATCCGT                                                 |
| PBI121-SbCHI-R     | <u>cgatcggggaaattcgagctc</u> TTAAAACAACCTCCGATAGTCTTGC          |
| PBI121-SbCHS-2-F   | <u>acgggggactctagaggatcc</u> ATGGTGACAGTTGAAGAATTCCAC           |
|                    | <u>ggcctgTTTCAAGAGAGAAAAATTAGTGGCACCTGAACC</u> ATTGAGAGGCACA    |
| PBI121-SbCHS-2-R   | CTATGC                                                          |
|                    | <u>cttgaaaCAGGCCGGTGACGTTGAAGAGAACCCAGGTCCA</u> ATGGAAGTCACA    |
| PBI121-SbFNSII-2-F | CTGAATGTGG                                                      |
| PBI121-SbFNSII-2-R | <u>cgatcggggaaattcgagctc</u> TCAGTGCCCGGAAATAACCC               |

<sup>a</sup> The homology arm sequences are noted in red; All restriction enzyme sites are underlined.

<sup>b</sup> The sequence of P2A polypeptides are noted in green.

#### Primers for Round II of multigene assembly

| Primer         | Sequences (5' to 3')                                  |
|----------------|-------------------------------------------------------|
| 1300-35S-F1    | <u>ctatgacatgattacgaattc</u> TGAGACTTTTCAACAAAGGGT    |
| 1300-35S-R1    | <u>gcccgatttctccat</u> TGTTCTCTCCAAATGAAATGAACTTC     |
| 35S-CLL-CHI-F1 | <u>tggagagaaca</u> ATGGAGAAATCGGGCTATGGC              |
| 35S-CLL-CHI-R1 | <u>gaacgaaagct</u> TTAAAACAACTCCGATAGTCTTGCC          |
| 1300-Te9-F1    | <u>ttgttttaa</u> AGCTTTCGTTCGTATCATCG                 |
| 1300-Te9-R1    | <u>acgacggccagtgccaaagctt</u> TTGATGCATGTTGTCAATCAAT  |
| 1300-UBQ-F1    | <u>ctatgacatgattacgaattc</u> GTCGACGAGTCAGTAATAAACGGC |
| 1300-UBQ-R1    | <u>cttcaactgtcaccat</u> CTGTTAATCAGAAAACTCAGATTAATCG  |
| 35S-CHS-FNS-F1 | <u>ctgattaacag</u> ATGGTGACAGTTGAAGAATTCCACC          |
| 35S-CHS-FNS-R1 | <u>tttgaacgatc</u> TCAGTGCCCGGAAATAACCC               |
| 1300-Tnos-F1   | <u>gggcactga</u> GATCGTTCAAACATTTGGCAATAA             |
| 1300-Tnos-R1   | <u>acgacggccagtgccaaagctt</u> GATCTAGTAACATAGATGACAC  |

<sup>a</sup> The homology arm sequences are noted in red; All restriction enzyme sites are underlined.

#### Primers for Round III of multigene assembly

| Primer                | Sequences (5' to 3')                                        |
|-----------------------|-------------------------------------------------------------|
| PD7-SbCYP2D1.1-Thsp-F | <u>ctatgacatgattacgaattc</u> ATAGGCAACCGTGGACTTCTTC         |
| PD7-SbCYP2D1.1Thsp-R  | <u>cctttgttgaaaagtctca</u> CTTATCTTTAATCATATTCCATAGTCCATACC |
| 35S-CLL-CHI-Te9-F2    | <u>ttaaagataa</u> TGAGACTTTTCAACAAAGGGTAATATC               |
| 35S-CLL-CHI-Te9-R2    | <u>acgacggccagtgccaaagctt</u> TTGATGCATGTTGTCAATCAAT        |

<sup>a</sup> The homology arm sequences are noted in red; All restriction enzyme sites are underlined.

#### Primers for Round IV of multigene assembly

| Primer | Sequences (5' to 3')                                |
|--------|-----------------------------------------------------|
| FCC-F3 | <u>ctatgacatgattacgaattc</u> ATAGGCAACCGTGGACTTCTTC |
| FCC-R3 | <u>ttactgactcgtcgac</u> CTTGGACTCCCATGTTGGCA        |
| CF-F3  | <u>aacatgggagtcgaag</u> GTCGACGAGTCAGTAATAAACGGC    |
| CF-R3  | <u>acgacggccagtgccaagctt</u> GATCTAGTAACATAGATGACAC |

<sup>a</sup> The homology arm sequences are noted in red; All restriction enzyme sites are underlined.

**Table S2. Primers for PCR detection**

| Primer                | Sequences (5' to 3')       |
|-----------------------|----------------------------|
| <i>SbCYP82D1.1</i> -F | ATGGAGTTGAGCTCTGTCATCTATG  |
| <i>SbCYP82D1.1</i> -R | TAATATAGAGTAGGTGACAACCTTGG |
| <i>SbCLL-7</i> -F     | ATGGAGAAATCGGGCTATGG       |
| <i>SbCLL-7</i> -R     | TTATAACTTCGATCGGACCTTTTC   |
| <i>SbCHI</i> -F       | ATGTCTGCTTCGCCATCCGT       |
| <i>SbCHI</i> -R       | TTAAAACAACCTCCGATAGTCTTGC  |
| <i>SbCHS-2</i> -F     | ATGGTGACAGTTGAAGAATTCCAC   |
| <i>SbCHS-2</i> -R     | TCAATTGAGAGGCACACTATGC     |
| <i>SbFNSII-2</i> -F   | ATGGAAGTCACACTGAATGTGG     |
| <i>SbFNSII-2</i> -R   | TCAGTGCCCGGAAATAACCC       |
| Hyg-F                 | TTGGCGACCTCGTATTGGGA       |
| Hyg-R                 | CAAGACCTGCCTGAAACCGAA      |



**Table S3. Primers for qRT-PCR analysis**

| Primer                 | Sequences (5' to 3')     |
|------------------------|--------------------------|
| <i>SbCYP82D1.1</i> -qF | TTGACAAAAAGGTGGAGGTT     |
| <i>SbCYP82D1.1</i> -qR | CAACACTCTCGGTCATATCC     |
| <i>SbCLL-7</i> -qF     | ATTGAGGCCACCGTTGTATC     |
| <i>SbCLL-7</i> -qR     | CGACTTTTGAAACCGTGGAT     |
| <i>SbCHI</i> -qF       | AAGGCAGTAATAGAGAACAAACAG |
| <i>SbCHI</i> -qR       | TTAAAACAACCTCCGATAGTCTTG |
| <i>SbCHS-2</i> -qF     | TTCGTGATGGATGAGATGAG     |
| <i>SbCHS-2</i> -qR     | CCATTGAGAGGCACACTATG     |
| <i>SbFNSII-2</i> -qF   | TCACCTATGGCGTCTCCTTC     |
| <i>SbFNSII-2</i> -qR   | CAGCTCCTCAGTGACGTTGA     |
| <i>Leactin</i> -qF     | CCAGGTATTGCTGATAGAATGAG  |
| <i>Leactin</i> -qR     | GAGCCTCCAATCCAGACAC      |
